# Supplementary material
Source: Springer Nature journal article supplement (https://www.springermedizin.de/resource/supplementary/12974_2014_962_MOESM2_ESM.pdf/9600538)

**A**

|                       | Hypo | rHypoE-7 |
|-----------------------|------|----------|
| NSE                   | ++   | ++       |
| GPR40                 | +    | -        |
| GPR120                | ++   | ++       |
| AgRP                  | ++   | ++       |
| NPY                   | ++   | +        |
| POMC                  | ++   | -        |
| TNF $\alpha$ R        | +    | ++       |
| TLR4                  | +    | ++       |
| NF- $\kappa$ B        | +    | +        |
| I $\kappa$ B $\alpha$ | ++   | ++       |
| IKK- $\beta$          | +    | +        |

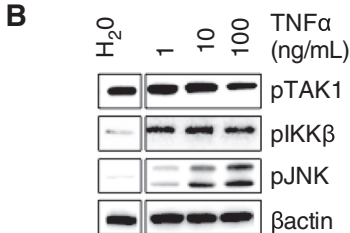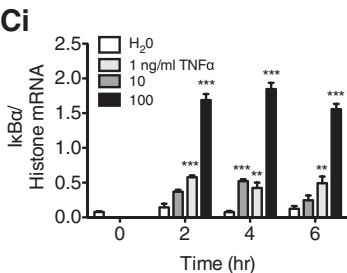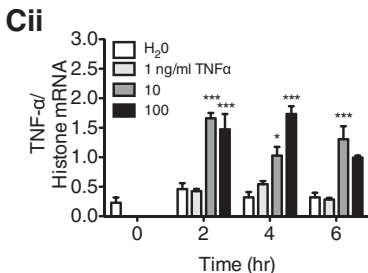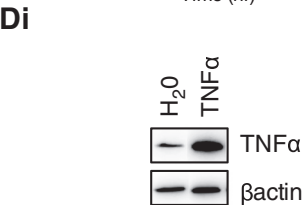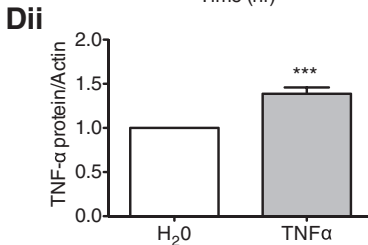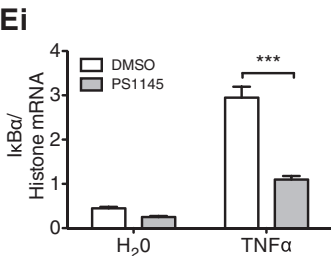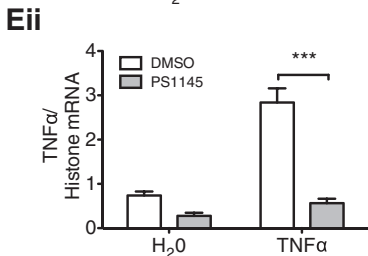

Supplement: MOESM2 [file 9600538]
